# Supplementary material for: Summer fluxes of methane and carbon dioxide from a pond and floating mat in a continental Canadian peatland
Source: Copernicus journal article supplement (doi:10.5194/bg-2015-594), 2016-01-22
Supplement: Supplementary file 1 [file bg-2015-594-supplement.pdf]

1  
2  
3  
4  
5  
6  
7  
8  
9  
10  
11  
12  
13  
14  
15  
16  
17  
18  
19  
20  
21  
22  
23

## Supplementary Information

# Summer fluxes of methane and carbon dioxide from a pond and floating mat in a continental Canadian peatland

M. Burger<sup>1,2</sup>, S. Berger<sup>1,2</sup>, I. Spangenberg<sup>1,2</sup> and C. Blodau<sup>1,2</sup>

[1] Ecohydrology and Biogeochemistry Group, Institute of Landscape Ecology, University of Münster, Germany

[2] School of Environmental Sciences, University of Guelph, Canada

Correspondence to: C. Blodau ([christian.blodau@uni-muenster.de](mailto:christian.blodau@uni-muenster.de))

### 1. Chamber flux measurements

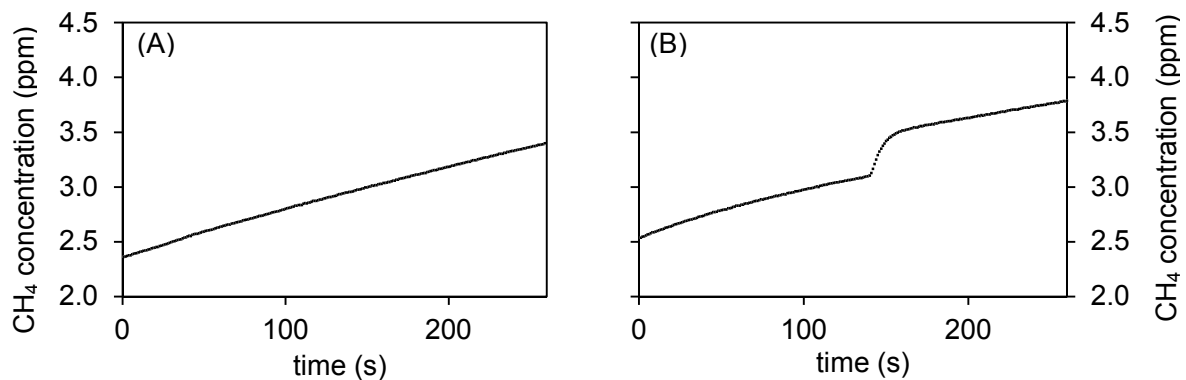

**Figure S1.** Example of a concentration time series with a constant slope representing diffusive CH<sub>4</sub> flux or continuous flux of micro-bubbles (panel A) and example of a concentration time series including a CH<sub>4</sub> bubble event visible by a sudden increase of slope over a short duration (panel B).

## 1 2. CO<sub>2</sub> flux calculation with the gradient method

2 CO<sub>2</sub> fluxes across the air-water interface were estimated according to the boundary layer equation  
3 approach, equation (1).

$$4 F = k_{\text{CO}_2} \cdot (c_{\text{water}} - c_{\text{atm}}) \quad (1)$$

F CO<sub>2</sub> flux (mmol m<sup>-2</sup> h<sup>-1</sup>)  
k<sub>CO<sub>2</sub></sub> gas transfer velocity (m h<sup>-1</sup>)  
c<sub>water</sub> CO<sub>2</sub> concentration in the surface water (mmol m<sup>-3</sup>)  
c<sub>atm</sub> theoretical CO<sub>2</sub> concentration of the surface water in equilibrium with the atmospheric CO<sub>2</sub> concentration (mmol m<sup>-3</sup>)

5 c<sub>water</sub> and c<sub>atm</sub> were calculated with Henry's law from the CO<sub>2</sub> mixing ratios measured in the surface  
6 water and the atmosphere using Henry's law constants (Sander, 1999) corrected for surface water  
7 temperature. The gas transfer velocity k<sub>CO<sub>2</sub></sub> was calculated from the gas transfer velocity normalized  
8 to a Schmidt number of 600 (k<sub>600</sub>) according to equation (2) (Crusius and Wanninkhof, 2003).

$$9 k_{\text{CO}_2} = k_{600} \cdot \left(\frac{Sc_{\text{CO}_2}}{600}\right)^{-b} \quad (2)$$

k<sub>CO<sub>2</sub></sub> gas transfer velocity (m h<sup>-1</sup>)  
k<sub>600</sub> gas transfer velocity normalized to a Schmidt number of 600 (m h<sup>-1</sup>)  
Sc<sub>CO<sub>2</sub></sub> Schmidt number for CO<sub>2</sub> corrected for temperature (-)  
600 Schmidt number of CO<sub>2</sub> at 20 °C  
B  $\frac{1}{3}$  for wind speed > 3 m s<sup>-1</sup>  
 $\frac{2}{3}$  for wind speed ≤ 3 m s<sup>-1</sup>

10 k<sub>600</sub> depends on the wind speed at a height of 10 m according to the empirical relationship defined  
11 by Cole and Caraco (1998) (equation 3). Sc<sub>CO<sub>2</sub></sub> was calculated as a function of water temperature  
12 (equation 5; Wanninkhof, 1992).

13

$$14 k_{600} = 0.0207 + 0.00215 \cdot U_{10}^{1.7} \quad (3)$$

k<sub>600</sub> gas transfer velocity normalized to a Schmidt number of 600 (m h<sup>-1</sup>)  
U<sub>10</sub> wind speed at 10 m height (m s<sup>-1</sup>)

$$15 Sc_{\text{CO}_2} = 1911.1 - 118.11 \cdot T + 3.4527 \cdot T^2 - 0.04132 \cdot T^3 \quad (4)$$

Sc<sub>CO<sub>2</sub></sub> Schmidt number for CO<sub>2</sub> corrected for temperature (-)  
T water temperature (°C)

16 Wind speed at a height of 10 m was estimated from the wind speed measurements at the weather  
17 station at a height of 2.5 m according to equation (5) (Singh et al., 2007).

$$1 \quad U_2 = U_1 \cdot \left(\frac{h_2}{h_1}\right)^{\frac{1}{6}} \quad (5)$$

- $U_2$  estimated wind speed ( $\text{m s}^{-1}$ ) at  $h_2$
- $U_1$  measured wind speed ( $\text{m s}^{-1}$ ) at  $h_1$
- $h_2$  height (m) of the estimated wind speed  $U_2$ ; 10 m
- $h_1$  height (m) of the measured wind speed  $U_1$ ; 2.5 m

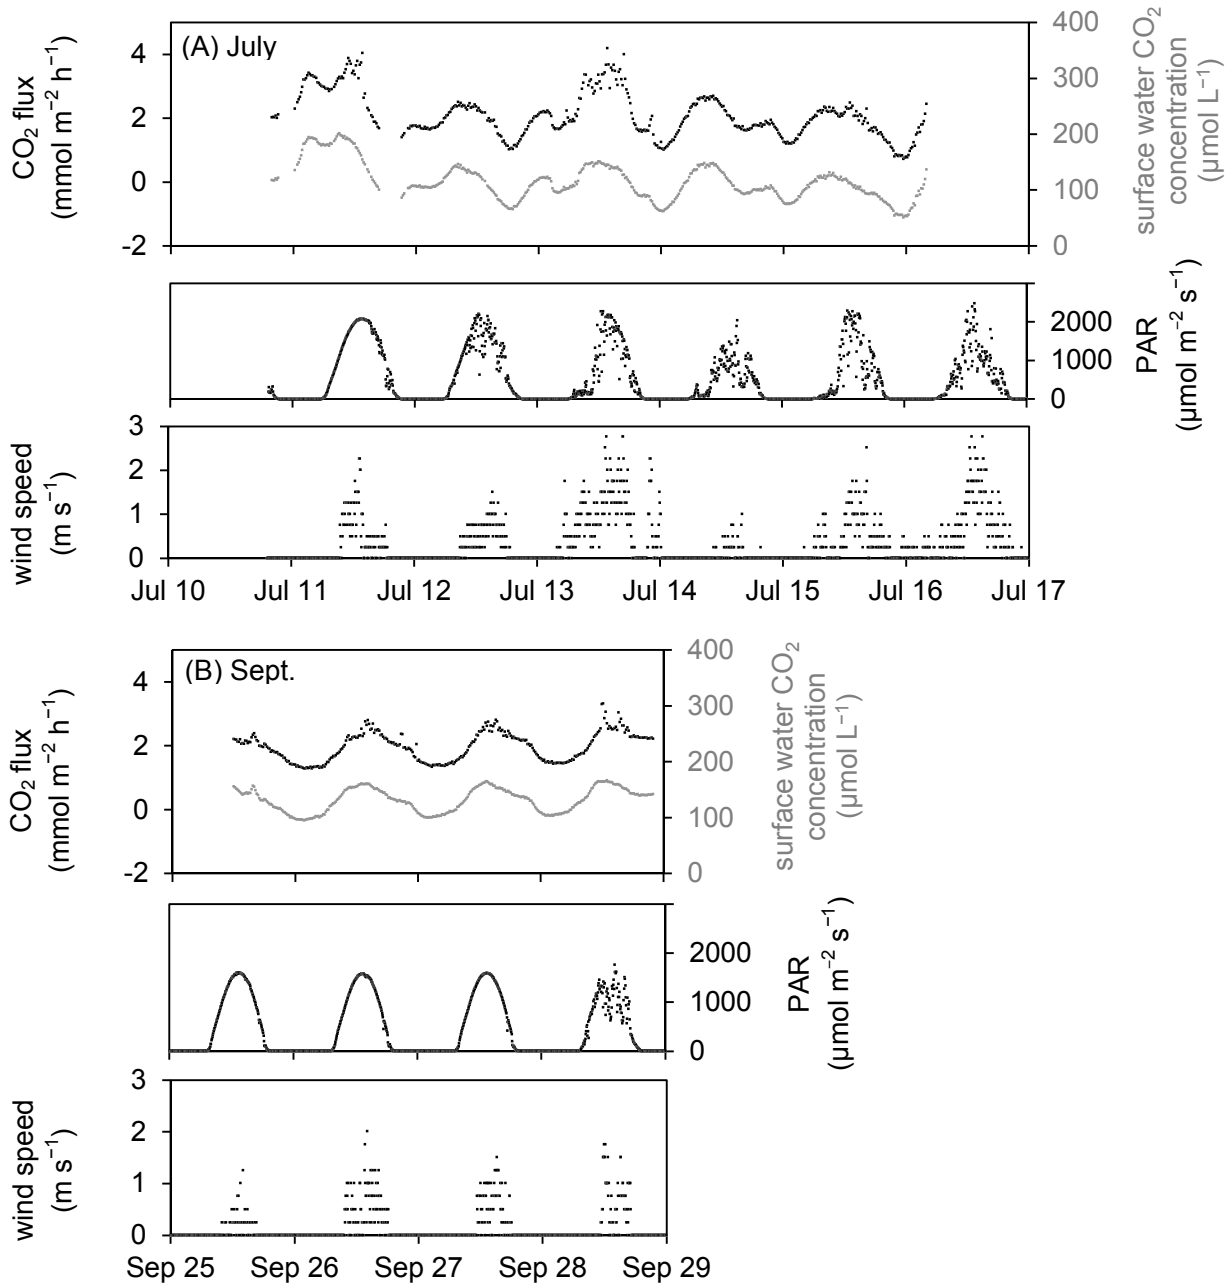

**Figure S2:** CO<sub>2</sub> concentrations in the surface water of the pond (gray symbols), CO<sub>2</sub> fluxes calculated with the gradient method (black symbols), photosynthetically active radiation and wind speed (both 5 min averages) during two periods in July (panel A) and September (panel B) 2014.

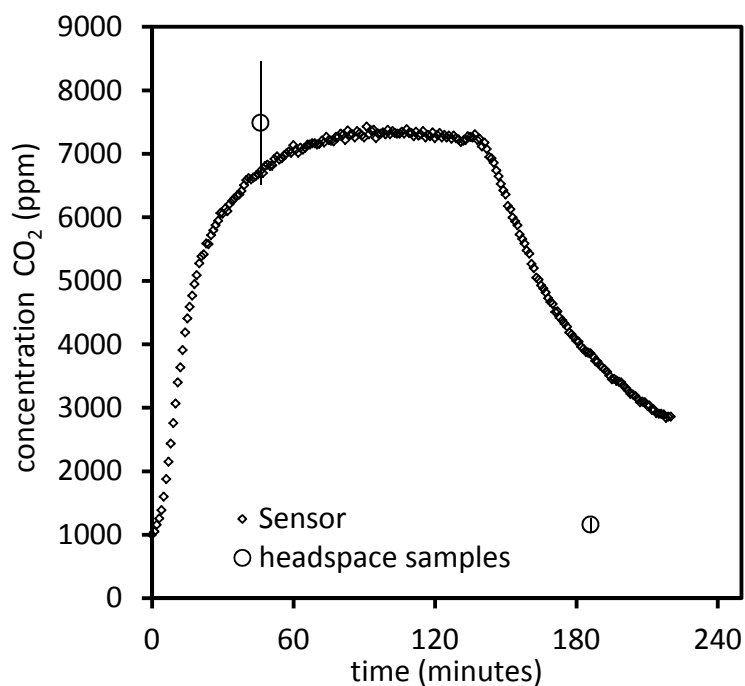

**Figure S3:** To estimate the response time of silicone-covered NDI CO<sub>2</sub> sensors, about 10 L of water were filled in a bucket and acidified to pH 4 by adding 1 M HCl. Subsequently CO<sub>2</sub> and air were bubbled through the solution from a gas cylinder and using an air pump, respectively, to adjust dissolved CO<sub>2</sub> concentrations and mix the water. Headspace samples (5 mL water, 7.5 mL gas phase) were taken and analyzed by gas chromatography as described in the Methods section. After 124 minutes CO<sub>2</sub> supply was stopped but air continuously pumped for another hour. The results suggest that equilibration was > 90% after one hour with increasing concentration and somewhat more delayed with decreasing concentrations.

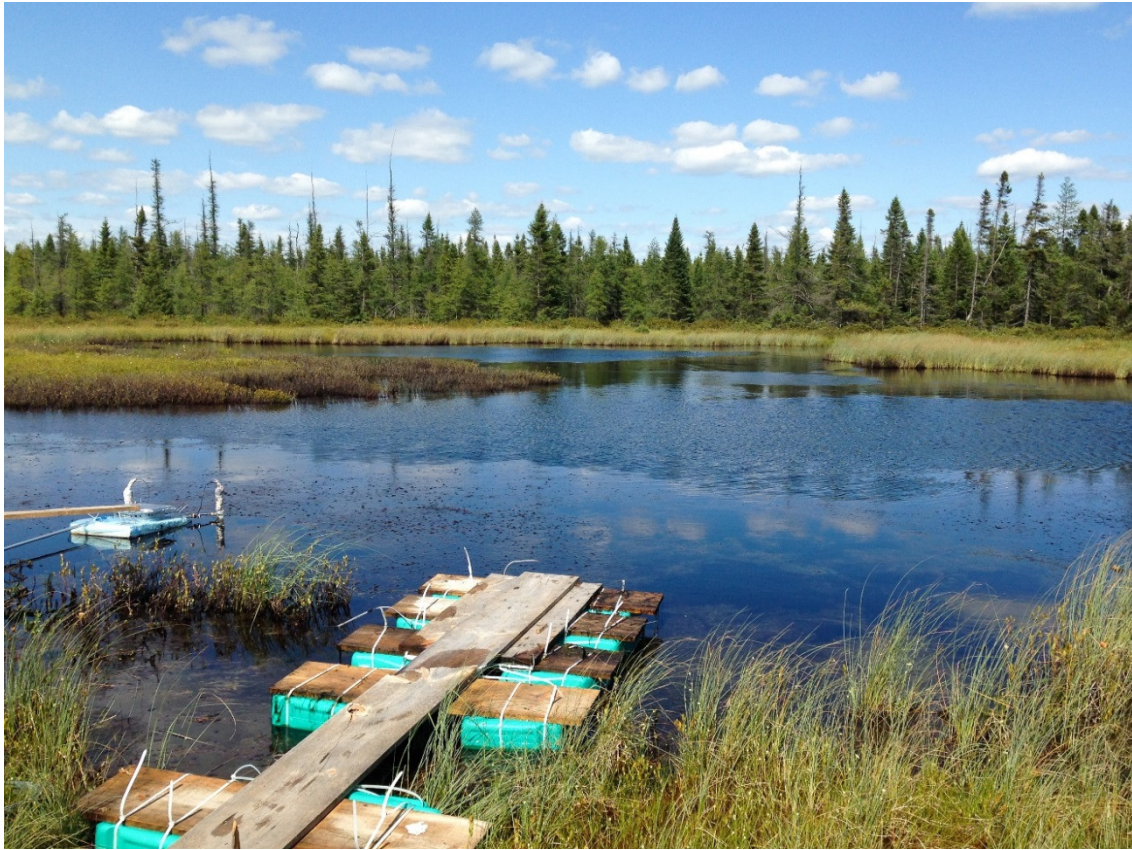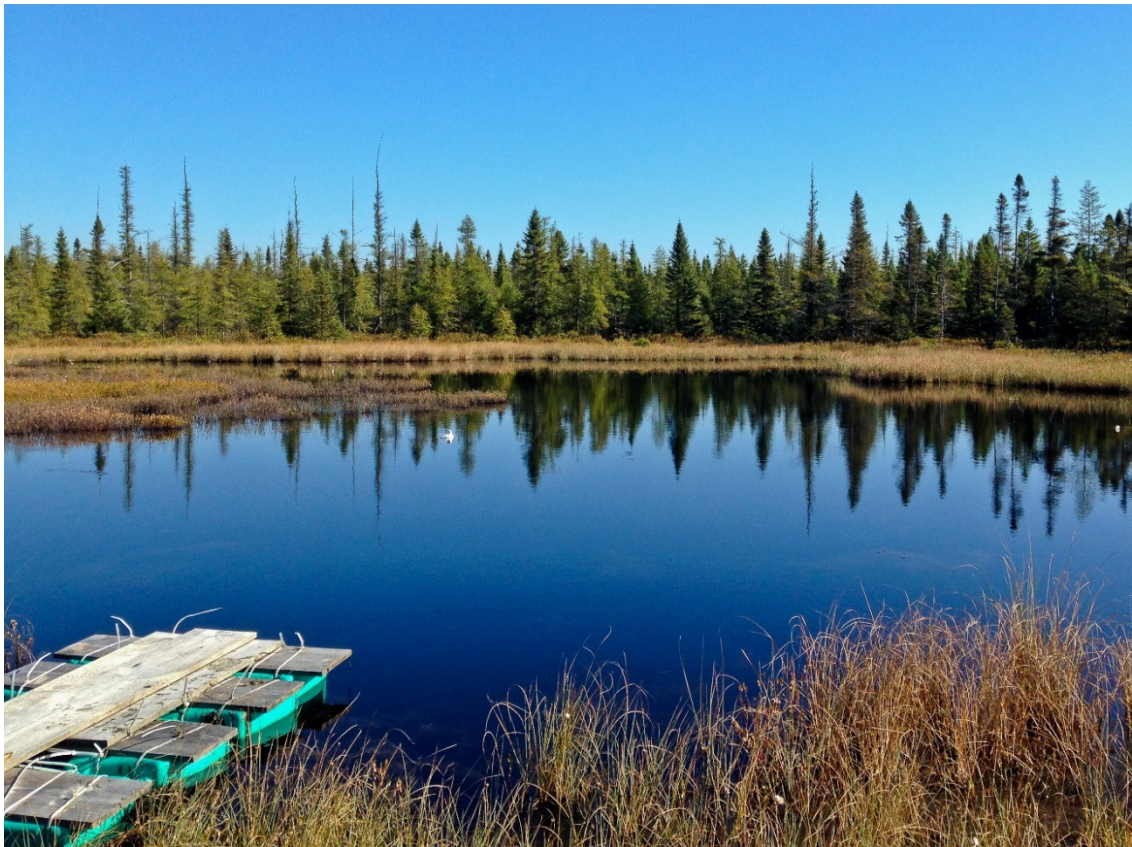

**Figure S4:** Studied pond with algal mat in the beginning of August 2014 (above) and without algal mat in the end of September 2014 (below).

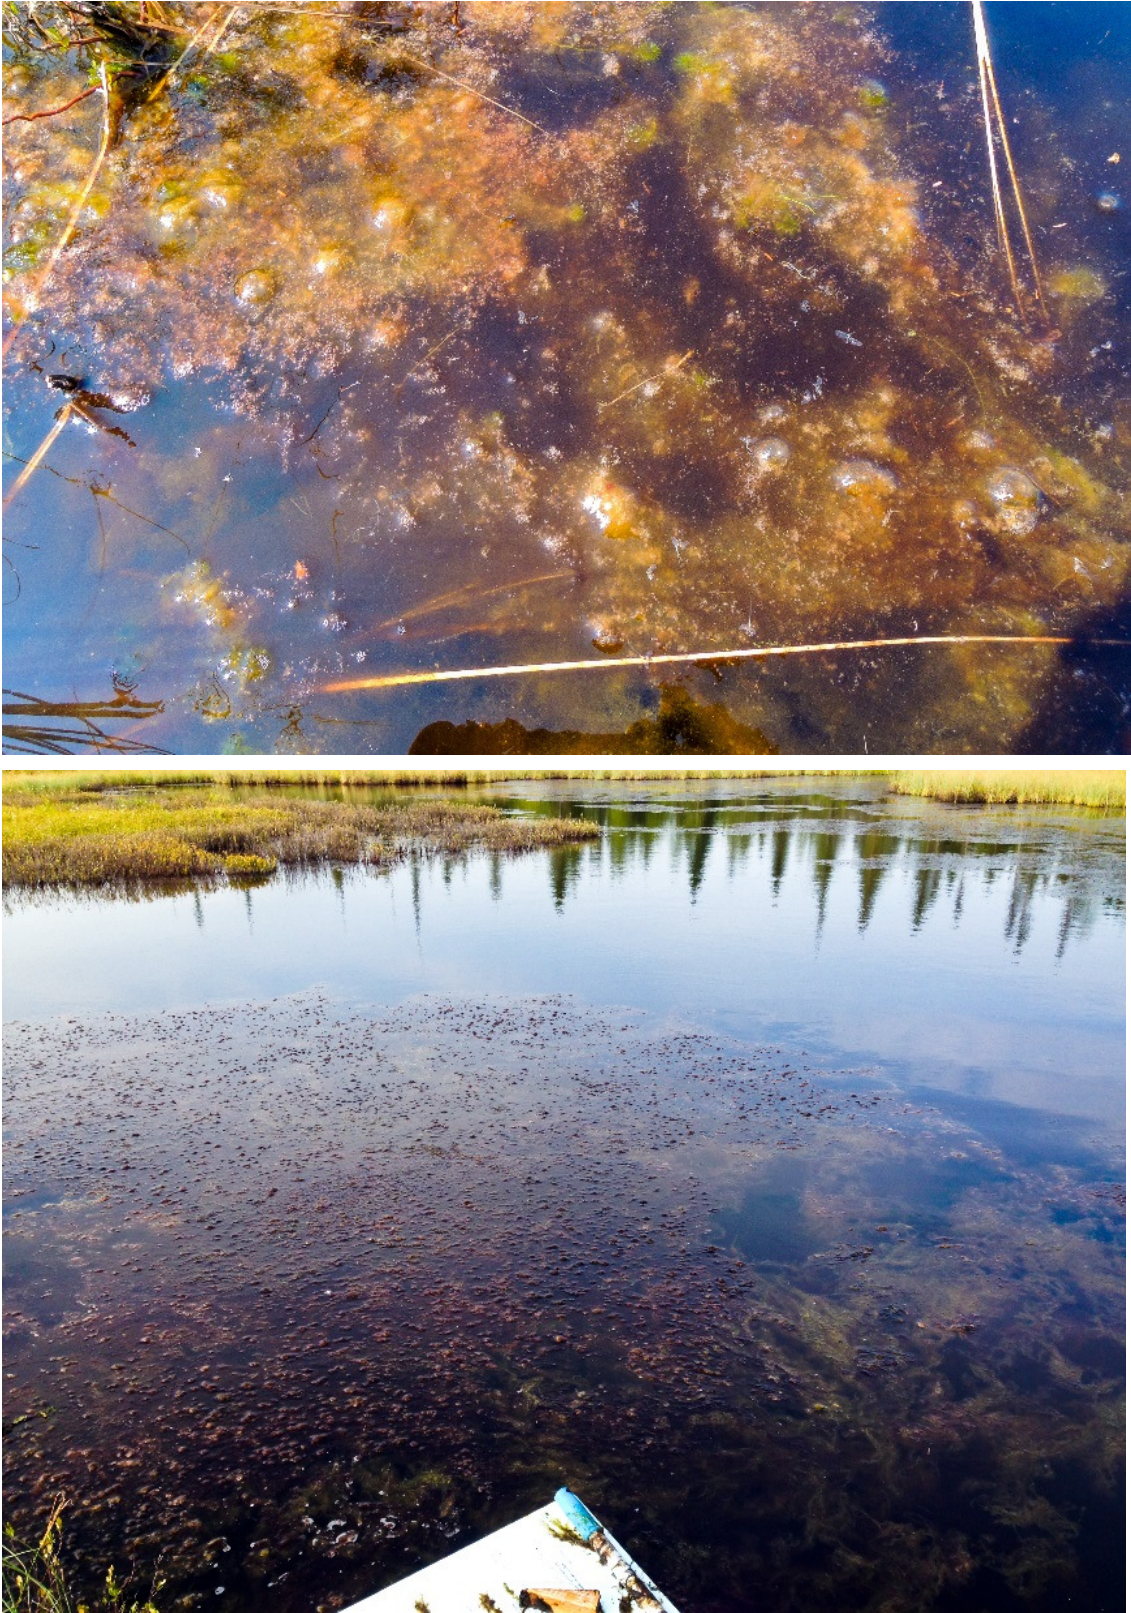

**Figure S5:** Close-up of algal mat in the beginning of August 2014 (above).

**Table S1.** Plant species composition of the floating mat, the surrounding treed area and the chamber measurement plots m1 to m3 (section **Error! Reference source not found.**); c: common, s: scattered, r: rare, -: absent; species nomenclature according to Hellquist and Crow (1999a), (1999b), Newmaster and Ragupathy (2012).

| species                                               | abundance    |            |      |     |    |
|-------------------------------------------------------|--------------|------------|------|-----|----|
|                                                       | floating mat | treed area | plot |     |    |
|                                                       |              |            | m1   | m2  | m3 |
| <i>Sphagnum angustifolium</i> (Russ.) C. Jens.        | c            | C          | c    | c   | c  |
| <i>Sphagnum magellanicum</i> Brid.                    | c            | C          | -    | -   | -  |
| <i>Sphagnum fuscum</i> (Schimp.) Klinggr.             | -            | S          | -    | -   | -  |
| <i>Sphagnum wulfianum</i> Girg.                       | -            | S          | -    | -   | -  |
| <i>Larix laricina</i> (DuRoi) K. Koch                 | -            | c-s        | -    | -   | -  |
| <i>Picea mariana</i> (Mill.) BSP.                     | -            | c-s        | -    | -   | -  |
| <i>Pinus strobus</i> L.                               | -            | R          | -    | -   | -  |
| <i>Eleocharis smallii</i> Britt.                      | -            | S          | -    | -   | -  |
| <i>Eriophorum vaginatum</i> L.                        | s            | S          | -    | -   | -  |
| <i>Eriophorum virginicum</i> L.                       | s            | S          | -    | -   | -  |
| <i>Dulichium arundinaceum</i> (L.) Britt.             | r            | -          | -    | -   | -  |
| <i>Rhynchospora alba</i> (L.) Vahl                    | c            | -          | s    | c-s | s  |
| <i>Carex aquatilis</i> Wahlenb.                       | s            | -          | r    | -   | s  |
| <i>Carex oligosperma</i> Michx.                       | s            | -          | -    | -   | -  |
| <i>Carex magellanica</i> Lam.                         | s            | -          | -    | -   | -  |
| <i>Carex disperma</i> Dew.                            | -            | S          | -    | -   | -  |
| <i>Myrica gale</i> L.                                 | r            | s-r        | -    | -   | -  |
| <i>Betula pumila</i> L.                               | -            | S          | -    | -   | -  |
| <i>Sarracenia purpurea</i> L.                         | s            | -          | -    | r   | -  |
| <i>Drosera rotundifolia</i> L.                        | r            | -          | -    | -   | -  |
| <i>Populus</i> sp.                                    | -            | S          | -    | -   | -  |
| <i>Rhododendron groenlandicum</i> (Oeder) Kron & Judd | r            | C          | -    | -   | -  |
| <i>Kalmia polifolia</i> Wang.                         | s            | S          | -    | r   | -  |
| <i>Kalmia angustifolia</i> L.                         | -            | R          | -    | -   | -  |
| <i>Andromeda glaucophylla</i> Link                    | s            | S          | -    | r   | -  |
| <i>Vaccinium oxycoccos</i> L.                         | s            | S          | -    | -   | r  |
| <i>Vaccinium myrtilloides</i> Hook.                   | -            | S          | -    | -   | -  |
| <i>Vaccinium macrocarpon</i> Ait.                     | -            | S          | -    | -   | -  |
| <i>Vaccinium corymbosum</i> L.                        | -            | S          | -    | -   | -  |
| <i>Vaccinium uliginosum</i> L.                        | -            | R          | -    | -   | -  |
| <i>Chamaedaphne calyculata</i> (L.) Moench            | s            | c-s        | s    | s   | s  |
| <i>Aronia melanocarpa</i> (Michx.) Ell.               | -            | S          | -    | -   | -  |
| <i>Cypripedium parviflorum</i> Salisb.                | -            | R          | -    | -   | -  |
| <i>Cypripedium reginae</i> Walt.                      | -            | R          | -    | -   | -  |

**Table S2.** Environmental variables measured at the study site with the corresponding instruments, measuring height, orientation, temporal resolution and accuracy.

| Variable                                                                    | instrument                                                                 | measuring height or depth <sup>a</sup> | orientation    | temporal resolution | accuracy                                                               |
|-----------------------------------------------------------------------------|----------------------------------------------------------------------------|----------------------------------------|----------------|---------------------|------------------------------------------------------------------------|
| air temperature (°C)                                                        | Temperature/RH Smart Sensor, S-THB-M002, Onset                             | + 2.0 m                                | north          | 5 min               | ± 0.21 °C                                                              |
| relative humidity (%)                                                       | Temperature/RH Smart Sensor, S-THB-M002, Onset                             | + 2.0 m                                | north          | 5 min               | ± 2.5 %                                                                |
| wind speed (m s <sup>-1</sup> )                                             | Wind Speed Smart Sensor, S-WSA-M002, Onset                                 | + 2.5 m                                | west-southwest | 5 min               | ± 1.1 m s <sup>-1</sup> or 4 % (whichever is greater)                  |
| wind direction (°)                                                          | Wind Direction Smart Sensor, S-WDA-M002, Onset                             | + 2.5 m                                | east-northeast | 5 min               | ± 5°                                                                   |
| photosynthetically active radiation (μmol m <sup>-2</sup> s <sup>-1</sup> ) | Photosynthetic Light (PAR) Smart Sensor, S-LIA-M002, Onset                 | + 2.3 m                                | south          | 5 min               | ± 5 μmol m <sup>-2</sup> s <sup>-1</sup> or 5 % (whichever is greater) |
| precipitation (mm)                                                          | .2mm Rainfall Smart Sensor, S-RGB-M002, Onset                              | + 1.0 m                                | west-northwest | 5 min               | ± 1 %                                                                  |
| water temperature pond (°C)                                                 | CTD-Diver, Schlumberger                                                    | - 0.2 m                                | -              | 5 min               | ± 0.1 °C                                                               |
| temperature floating mat (°C)                                               | Air/Water/Soil Temp Sensor, TMC6-HD, Onset                                 | - 5 and - 10 cm                        | -              | 5 min               | ± 0.25 °C                                                              |
| air pressure (kPa)                                                          | Enclosed Path CO <sub>2</sub> / H <sub>2</sub> O Analyzer, LI-7200, LI-COR | + 5.0 m                                | -              | 30 min              | ± 4 %                                                                  |

<sup>a</sup>: indicated by positive (height) or negative sign (depth)

**Table S3.** Distance from the floating mat and water depth of the chamber measurement plots of the pond.

| plot | distance from the floating mat (m) | water depth (m) |
|------|------------------------------------|-----------------|
| p1   | 4.55                               | 0.73            |
| p2   | 3.76                               | 0.83            |
| p3   | 3.15                               | 0.77            |
| p4   | 1.91                               | 0.62            |
| p5   | 0.80                               | 0.52            |
| p6   | 0.73                               | 0.42            |



**Table S4.** CH<sub>4</sub> fluxes from the studied peatland, floating mat and pond in comparison to CH<sub>4</sub> fluxes reported from northern peatlands, floating mats and ponds in literature.

| System                                                                                                 | Location         | CH <sub>4</sub> fluxes (mmol m <sup>-2</sup> h <sup>-1</sup> ) |         |                      |                    | time horizon  | reference                  |
|--------------------------------------------------------------------------------------------------------|------------------|----------------------------------------------------------------|---------|----------------------|--------------------|---------------|----------------------------|
|                                                                                                        |                  | mini mum                                                       | me dian | mean                 | maxi mum           |               |                            |
| <b>Peatlands</b>                                                                                       |                  |                                                                |         |                      |                    |               |                            |
| peatland site, Wylde Lake Bog                                                                          | Ontario, Canada  | 0.00                                                           | 0.32    | 0.71                 | 28.13              | July to Sept. | this study                 |
| Bog                                                                                                    | Ontario, Canada  |                                                                |         | 0.07                 |                    | July and Aug. | Dinsmore et al. (2009)     |
| Fen                                                                                                    | Michigan, USA    |                                                                |         | 0.02                 |                    | April to Oct. | Ballantyne et al. (2014)   |
| fen hummock<br>fen lawns and hollows                                                                   | Quebec, Canada   |                                                                |         | 0.07<br>0.09         |                    | two years     | Trudeau et al. (2013)      |
| 2 fens, 1 bog                                                                                          | Ontario, Canada  |                                                                |         | 0.04                 |                    | June to Oct.  | Hamilton et al. (1994)     |
| poor fen                                                                                               | Quebec, Canada   | 0.00                                                           | 0.11    |                      | 0.38               | May to Sept.  | Strack et al. (2006)       |
| bog hummocks<br>bog lawns and ponds                                                                    | Ontario, Canada  |                                                                |         | 0.01<br>0.26         |                    | May to Oct.   | Moore et al. (2011)        |
| <b>floating mats</b>                                                                                   |                  |                                                                |         |                      |                    |               |                            |
| floating mat in Wylde Lake Bog                                                                         | Ontario, Canada  | 0.06                                                           | 0.64    | 1.52                 | 14.98              | July to Sept. | this study                 |
| floating mat on thermokarst pond in bog                                                                | Siberia, Russia  |                                                                |         | 0.14                 |                    | one year      | Flessa et al. (2008)       |
| floating mats in bog<br><i>Sphagnum</i><br><i>Phragmites australis</i><br><i>Menyanthes trifoliata</i> | central Japan    |                                                                |         | 0.18<br>0.76<br>1.17 |                    | April to Oct. | Sugimoto and Fujita (1997) |
| <b>Ponds</b>                                                                                           |                  |                                                                |         |                      |                    |               |                            |
| pond in Wylde Lake Bog<br>area: 847 m <sup>2</sup><br>depth: 0.5 m                                     | Ontario, Canada  | 0.00                                                           | 0.14    | 0.22                 | 2.00               | July to Sept. | this study                 |
| Beaver pond<br>depth: 0.8 m                                                                            | Ontario, Canada  |                                                                |         | 0.01                 |                    | July and Aug. | Dinsmore et al. (2009)     |
| 2 fen pools<br>area: 65 and 200 m <sup>2</sup><br>depth: 0.4 and 0.9 m                                 | Quebec, Canada   |                                                                |         | 0.50<br>and<br>0.23  |                    | 2 years       | Trudeau et al. (2013)      |
| 24 bog and fen ponds<br>area: 32 to 41620 m <sup>2</sup><br>depth: 0.1 to 2.0 m                        | Ontario, Canada  |                                                                |         | 0.38                 |                    | June to Oct.  | Hamilton et al. (1994)     |
| fen pond<br>area: 10000 m <sup>2</sup><br>max. depth: 3.2 m                                            | northern Finland |                                                                |         | 0.48                 |                    | May to Sept.  | Huttunen et al. (2002)     |
| 5 bog pools<br>area: 128 to 2563 m <sup>2</sup><br>depth: 0.4 to 2.0 m                                 | Quebec, Canada   | 0.00<br>to<br>0.01                                             |         | 0.01<br>to<br>0.20   | 0.04<br>to<br>0.41 | 1.5 years     | Pelletier et al. (2014)    |
| fen pond<br>area: 5000 m <sup>2</sup><br>depth: 1 m                                                    | Siberia, Russia  | 0.03                                                           | 0.06    | 0.11                 | 0.31               | July to Sept. | Repo et al. (2007)         |

**Table S5.** Daytime maximum net ecosystem exchange (NEE) and ecosystem respiration (ER) of the studied peatland and floating mat in comparison to respective values from temperate peatlands reported in literature.

| System                         | Location        | maximum NEE and ER ( $\text{mmol m}^{-2} \text{h}^{-1}$ ) |                 |                 |                | time horizon  | reference                |
|--------------------------------|-----------------|-----------------------------------------------------------|-----------------|-----------------|----------------|---------------|--------------------------|
|                                |                 | minimum                                                   | median          | mean            | maximum        |               |                          |
| peatland site, Wylde Lake Bog  | Ontario, Canada | -36.96<br>2.61                                            | -16.98<br>11.98 | -18.73<br>13.59 | -8.10<br>36.93 | July to Sept. | this study               |
| floating mat in Wylde Lake Bog | Ontario, Canada | -11.46<br>0.53                                            | -4.81<br>6.77   | -4.40<br>6.41   | 0.71<br>13.45  | July to Sept. | this study               |
| Bog                            | Ontario, Canada |                                                           |                 | -29.7<br>15.3   |                | May to Sept.  | Larmola et al. (2013)    |
| Fen                            | Michigan, USA   |                                                           |                 | -7.56<br>8.64   |                | April to Oct. | Ballantyne et al. (2014) |

**Table S6.** CO<sub>2</sub> fluxes from the studied pond in comparison to CO<sub>2</sub> fluxes from ponds in northern peatlands reported in literature.

| System                                                                          | location         | CO <sub>2</sub> fluxes ( $\text{mmol m}^{-2} \text{h}^{-1}$ ) |        |                    |                    | time horizon  | reference               |
|---------------------------------------------------------------------------------|------------------|---------------------------------------------------------------|--------|--------------------|--------------------|---------------|-------------------------|
|                                                                                 |                  | minimum                                                       | median | mean               | maximum            |               |                         |
| pond in Wylde Lake Bog<br>area: 847 m <sup>2</sup><br>depth: 0.5 m              | Ontario, Canada  | -0.75                                                         | 1.16   | 1.32               | 4.59               | July to Sept. | this study              |
| Beaver pond<br>depth: 0.8 m                                                     | Ontario, Canada  |                                                               |        | 13.48              |                    | July and Aug. | Dinsmore et al. (2009)  |
| 24 bog and fen ponds<br>area: 32 to 41620 m <sup>2</sup><br>depth: 0.1 to 2.0 m | Ontario, Canada  |                                                               |        | 6.96               |                    | June to Oct.  | Hamilton et al. (1994)  |
| peatland pond<br>area: 10000 m <sup>2</sup><br>max. depth: 3.2 m                | northern Finland |                                                               |        | 0.50               |                    | May to Sept.  | Huttunen et al. (2002)  |
| 5 bog pools<br>area: 128 to 2563 m <sup>2</sup><br>depth: 0.4 to 2.0 m          | Quebec, Canada   | 0.04<br>to<br>0.34                                            |        | 0.32<br>to<br>0.80 | 0.53<br>to<br>1.98 | 1.5 years     | Pelletier et al. (2014) |
| fen pond<br>area: 5000 m <sup>2</sup><br>depth: 1 m                             | Siberia, Russia  | 0.85                                                          | 1.42   | 1.52               | 2.94               | July to Sept. | Repo et al. (2007)      |

## References

- Ballantyne, D.M., Hribljan, J.A., Pypker, T.G., Chimner, R.A.: Long-term water table manipulations alter peatland gaseous carbon fluxes in Northern Michigan. *Wetlands Ecology and Management* 22, 35–47, 2014.
- Cole, J.J., Caraco, N.F.: Atmospheric exchange of carbon dioxide in a low-wind oligotrophic lake measured by the addition of SF<sub>6</sub>. *Limnology and Oceanography* 43, 647–656, 1998.
- Crusius, J., Wanninkhof, R.: Gas transfer velocities measured at low wind speed over a lake. *Limnology and Oceanography* 48, 1010–1017, 2003.
- Dinsmore, K.J., Billett, M.F., Moore, T.R.: Transfer of carbon dioxide and methane through the soil-water-atmosphere system at Mer Bleue peatland, Canada. *Hydrological Processes* 23, 330–341, 2009.
- Flessa, H., Rodionov, A., Guggenberger, G., Fuchs, H., Magdon, P., Shibistova, O., Zrazhevskaya, G., Mikheyeva, N., Kasansky, O., Blodau, C.: Landscape controls of CH<sub>4</sub> fluxes in a catchment of the forest tundra ecotone in northern Siberia. *Global Change Biology* 14, 2040–2056, 2008.
- Hamilton, J.D., Kelly, C.A., Rudd, J.W.M., Hesslein, R.H., Roulet, N.T.: Flux to the atmosphere of CH<sub>4</sub> and CO<sub>2</sub> from wetland ponds on the Hudson Bay lowlands (HBLs). *Journal of Geophysical Research* 99, 1495–1510, 1994.
- Hellquist, C.B., Crow, G.E.: *Aquatic and Wetland Plants of Northeastern North America, A Revised and Enlarged Edition of Norman C. Fassett's A Manual of Aquatic Plants, Volume II Angiosperms Monocotyledons*. Madison, 1999a.
- Hellquist, C.B., Crow, G.E.: *Aquatic and Wetland Plants of Northeastern North America, A Revised and Enlarged Edition of Norman C. Fassett's A Manual of Aquatic Plants, Volume I Pteridophytes, Gymnosperms, and Angiosperms Dicotyledons*. Madison, 1999b.
- Huttunen, J.T., Väisänen, T.S., Heikkinen, M., Hellsten, S., Nykänen, H., Nenonen, O., Martikainen, P.J.: Exchange of CO<sub>2</sub>, CH<sub>4</sub> and N<sub>2</sub>O between the atmosphere and two northern boreal ponds with catchments dominated by peatlands or forests. *Plant and Soil* 242, 137–146, 2002.

Larmola, T., Bubier, J.L., Kobyljanec, C., Basiliko, N., Juutinen, S., Humphreys, E.R., Preston, M., Moore, T.R.: Vegetation feedbacks of nutrient addition lead to a weaker carbon sink in an ombrotrophic bog. *Global Change Biology* 19, 3729–3739, 2013.

Moore, T.R., De Young, A., Bubier, J.L., Humphreys, E.R., Lafleur, P.M., Roulet, N.T.: A Multi-Year Record of Methane Flux at the Mer Bleue Bog, Southern Canada. *Ecosystems* 14, 646–657, 2011.

Newmaster, S.G., Ragupathy, S.: Flora Ontario – Integrated Botanical Information System (FOIBIS). University of Guelph. URL <http://www.uoguelph.ca/foibis/> (accessed April 24<sup>th</sup>, 2015), 2012.

Pelletier, L., Strachan, I.B., Garneau, M., Roulet, N.T.: Carbon release from boreal peatland open water pools: Implication for the contemporary C exchange. *Journal of Geophysical Research: Biogeosciences* 119, 207–222, 2014.

Repo, M.E., Huttunen, J.T., Naumov, A. V., Chichulin, A. V., Lapshina, E.D., Bleuten, W., Martikainen, P.J.: Release of CO<sub>2</sub> and CH<sub>4</sub> from small wetland lakes in western Siberia. *Tellus* 59B, 788–796, 2007.

Sander, R.: *Compilation of Henry's Law Constants for Inorganic and Organic Species of Potential Importance in Environmental Chemistry*. Max-Planck Institute of Chemistry, Mainz, 1999.

Singh, S., Bhatti, T.S., Kothari, D.P.: Wind Power Estimation Using Artificial Neural Network. *Journal of Energy Engineering* 133, 46–52, 2007.

Strack, M., Waller, M.F., Waddington, J.M.: Sedge succession and peatland methane dynamics: A potential feedback to climate change. *Ecosystems* 9, 278–287, 2006.

Sugimoto, A., Fujita, N.: Characteristics of methane emissions from different vegetations on a wetland. *Tellus* 49B, 382–392, 1997.

Trudeau, N.C., Garneau, M., Pelletier, L.: Methane fluxes from a patterned fen of the northeastern part of the La Grande river watershed, James Bay, Canada. *Biogeochemistry* 113, 409–422, 2013.

Wanninkhof, R.: Relationship Between Wind Speed and Gas Exchange Over the Ocean. *Journal of Geophysical Research* 97, 7373–7382, 1992.
